# Supplementary material for: China’s historical record in the search of tropical cyclones corresponding to ITCZ shifts over the past 2ka
Source: Copernicus journal article supplement (doi:10.5194/cp-2018-86), 2018-07-31
Supplement: Supplementary file 1 [file cp-2018-86-supplement.pdf]

Table 1. The statistical numbers of paleotyphoons in southeastern China from 0-1000 A.D. in Figure 3.

| Year | Count | Year | Count | Year | Count |
|------|-------|------|-------|------|-------|
| 0    | 0     | 450  | 1     | 900  | 2     |
| 10   | 1     | 460  | 0     | 910  | 0     |
| 20   | 2     | 470  | 3     | 920  | 2     |
| 30   | 0     | 480  | 1     | 930  | 3     |
| 40   | 0     | 490  | 4     | 940  | 0     |
| 50   | 0     | 500  | 6     | 950  | 2     |
| 60   | 0     | 510  | 2     | 960  | 2     |
| 70   | 0     | 520  | 2     | 970  | 1     |
| 80   | 0     | 530  | 0     | 980  | 1     |
| 90   | 2     | 540  | 0     | 990  | 0     |
| 100  | 1     | 550  | 0     | 1000 | 1     |
| 110  | 2     | 560  | 3     |      |       |
| 120  | 2     | 570  | 1     |      |       |
| 130  | 0     | 580  | 1     |      |       |
| 140  | 0     | 590  | 0     |      |       |
| 150  | 0     | 600  | 1     |      |       |
| 160  | 0     | 610  | 1     |      |       |
| 170  | 1     | 620  | 0     |      |       |
| 180  | 1     | 630  | 0     |      |       |
| 190  | 1     | 640  | 1     |      |       |
| 200  | 0     | 650  | 0     |      |       |
| 210  | 0     | 660  | 0     |      |       |
| 220  | 0     | 670  | 1     |      |       |
| 230  | 0     | 680  | 2     |      |       |
| 240  | 2     | 690  | 2     |      |       |
| 250  | 1     | 700  | 5     |      |       |
| 260  | 0     | 710  | 2     |      |       |
| 270  | 2     | 720  | 3     |      |       |
| 280  | 5     | 730  | 2     |      |       |
| 290  | 2     | 740  | 0     |      |       |
| 300  | 0     | 750  | 4     |      |       |
| 310  | 0     | 760  | 1     |      |       |
| 320  | 2     | 770  | 3     |      |       |
| 330  | 1     | 780  | 1     |      |       |
| 340  | 1     | 790  | 2     |      |       |
| 350  | 0     | 800  | 2     |      |       |
| 360  | 0     | 810  | 5     |      |       |
| 370  | 2     | 820  | 2     |      |       |
| 380  | 2     | 830  | 4     |      |       |
| 390  | 0     | 840  | 2     |      |       |
| 400  | 1     | 850  | 0     |      |       |
| 410  | 2     | 860  | 2     |      |       |
| 420  | 1     | 870  | 0     |      |       |
| 430  | 2     | 880  | 0     |      |       |
| 440  | 0     | 890  | 0     |      |       |

Table 2. The statistical numbers of paleotypoons in southeastern China from 1000-1910 A.D. in Figure 4.

| Year | Count | Year | Count |
|------|-------|------|-------|
| 1000 | 1     | 1490 | 4     |
| 1010 | 1     | 1500 | 3     |
| 1020 | 0     | 1510 | 7     |
| 1030 | 1     | 1520 | 11    |
| 1040 | 1     | 1530 | 6     |
| 1050 | 1     | 1540 | 6     |
| 1060 | 0     | 1550 | 7     |
| 1070 | 0     | 1560 | 7     |
| 1080 | 2     | 1570 | 8     |
| 1090 | 1     | 1580 | 6     |
| 1100 | 0     | 1590 | 5     |
| 1110 | 3     | 1600 | 8     |
| 1120 | 1     | 1610 | 6     |
| 1130 | 0     | 1620 | 10    |
| 1140 | 0     | 1630 | 9     |
| 1150 | 0     | 1640 | 13    |
| 1160 | 1     | 1650 | 12    |
| 1170 | 0     | 1660 | 14    |
| 1180 | 1     | 1670 | 20    |
| 1190 | 2     | 1680 | 12    |
| 1200 | 1     | 1690 | 4     |
| 1210 | 2     | 1700 | 5     |
| 1220 | 1     | 1710 | 5     |
| 1230 | 0     | 1720 | 9     |
| 1240 | 0     | 1730 | 8     |
| 1250 | 0     | 1740 | 8     |
| 1260 | 0     | 1750 | 8     |
| 1270 | 1     | 1760 | 10    |
| 1280 | 1     | 1770 | 13    |
| 1290 | 1     | 1780 | 10    |
| 1300 | 2     | 1790 | 8     |
| 1310 | 0     | 1800 | 6     |
| 1320 | 1     | 1810 | 6     |
| 1330 | 0     | 1820 | 9     |
| 1340 | 1     | 1830 | 4     |
| 1350 | 2     | 1840 | 7     |
| 1360 | 2     | 1850 | 8     |
| 1370 | 4     | 1860 | 15    |
| 1380 | 5     | 1870 | 10    |
| 1390 | 3     | 1880 | 8     |
| 1400 | 1     | 1890 | 6     |
| 1410 | 2     | 1900 | 9     |
| 1420 | 2     | 1910 | 2     |
| 1430 | 1     |      |       |
| 1440 | 1     |      |       |
| 1450 | 1     |      |       |
| 1460 | 0     |      |       |
| 1470 | 3     |      |       |
| 1480 | 2     |      |       |

Table 3. The monthly statistical numbers of paleotypoons in Figure 5.

Fig5a.

Fig. 5b

Fig. 5c

| Month | Count | Month | Count | Month | Count (China) | Count(Western Pacific) |
|-------|-------|-------|-------|-------|---------------|------------------------|
| 1     | 2     | 1     | 0     | 1     | 16            | 25                     |
| 2     | 0     | 2     | 0     | 2     | 6             | 8                      |
| 3     | 1     | 3     | 1     | 3     | 7             | 16                     |
| 4     | 17    | 4     | 0     | 4     | 24            | 34                     |
| 5     | 11    | 5     | 2     | 5     | 51            | 71                     |
| 6     | 22    | 6     | 3     | 6     | 64            | 136                    |
| 7     | 25    | 7     | 31    | 7     | 164           | 279                    |
| 8     | 19    | 8     | 40    | 8     | 224           | 378                    |
| 9     | 9     | 9     | 20    | 9     | 173           | 326                    |
| 10    | 3     | 10    | 2     | 10    | 96            | 238                    |
| 11    | 3     | 11    | 0     | 11    | 60            | 150                    |
| 12    | 4     | 12    | 0     | 12    | 29            | 70                     |

Table 4. The statistical numbers of paleotypoons in the regions of southeastern China from 1000-1910 A.D. in Figure 6.

| Year | Shandong | Jiangsu & Shanghai | Zhejiang | Fujian & Taiwan | Guangdong | Hainan |
|------|----------|--------------------|----------|-----------------|-----------|--------|
| 900  | 0        | 0                  | 0        | 0               | 0         | 0      |
| 910  | 0        | 0                  | 0        | 0               | 0         | 0      |
| 920  | 0        | 0                  | 0        | 0               | 0         | 0      |
| 930  | 0        | 0                  | 0        | 0               | 0         | 0      |
| 940  | 0        | 0                  | 0        | 0               | 0         | 0      |
| 950  | 0        | 0                  | 0        | 0               | 0         | 0      |
| 960  | 0        | 0                  | 0        | 0               | 0         | 0      |
| 970  | 0        | 0                  | 0        | 0               | 1         | 0      |
| 980  | 0        | 0                  | 0        | 0               | 0         | 1      |
| 990  | 0        | 0                  | 0        | 0               | 0         | 0      |
| 1000 | 0        | 0                  | 0        | 1               | 0         | 0      |
| 1010 | 0        | 0                  | 0        | 0               | 1         | 0      |
| 1020 | 0        | 0                  | 0        | 0               | 0         | 0      |
| 1030 | 0        | 0                  | 1        | 0               | 0         | 0      |
| 1040 | 0        | 0                  | 0        | 0               | 1         | 0      |
| 1050 | 0        | 0                  | 0        | 1               | 0         | 0      |
| 1060 | 0        | 0                  | 0        | 0               | 0         | 0      |
| 1070 | 0        | 0                  | 0        | 0               | 0         | 0      |
| 1080 | 0        | 0                  | 0        | 0               | 1         | 1      |
| 1090 | 0        | 0                  | 0        | 0               | 1         | 0      |
| 1100 | 0        | 0                  | 0        | 0               | 0         | 0      |
| 1110 | 0        | 0                  | 0        | 1               | 2         | 0      |
| 1120 | 0        | 0                  | 0        | 0               | 1         | 0      |
| 1130 | 0        | 0                  | 0        | 0               | 0         | 0      |
| 1140 | 0        | 0                  | 0        | 0               | 0         | 0      |
| 1150 | 0        | 0                  | 0        | 0               | 0         | 0      |
| 1160 | 0        | 0                  | 0        | 0               | 1         | 0      |
| 1170 | 0        | 0                  | 0        | 0               | 0         | 0      |
| 1180 | 0        | 0                  | 0        | 0               | 0         | 1      |
| 1190 | 0        | 0                  | 1        | 0               | 1         | 0      |
| 1200 | 0        | 0                  | 0        | 0               | 1         | 0      |
| 1210 | 0        | 0                  | 0        | 1               | 1         | 0      |
| 1220 | 0        | 0                  | 1        | 0               | 0         | 0      |
| 1230 | 0        | 0                  | 0        | 0               | 0         | 0      |
| 1240 | 0        | 0                  | 0        | 0               | 0         | 0      |
| 1250 | 0        | 0                  | 0        | 0               | 0         | 0      |
| 1260 | 0        | 0                  | 0        | 0               | 0         | 0      |
| 1270 | 0        | 0                  | 0        | 0               | 1         | 0      |
| 1280 | 0        | 0                  | 0        | 0               | 1         | 0      |
| 1290 | 0        | 0                  | 1        | 0               | 0         | 0      |
| 1300 | 0        | 0                  | 1        | 0               | 1         | 0      |
| 1310 | 0        | 0                  | 0        | 0               | 0         | 0      |
| 1320 | 0        | 0                  | 0        | 0               | 1         | 0      |
| 1330 | 0        | 0                  | 0        | 0               | 0         | 0      |
| 1340 | 0        | 0                  | 0        | 0               | 1         | 0      |
| 1350 | 0        | 0                  | 0        | 0               | 2         | 0      |
| 1360 | 0        | 0                  | 1        | 0               | 1         | 0      |
| 1370 | 0        | 1                  | 1        | 1               | 2         | 0      |
| 1380 | 0        | 1                  | 1        | 0               | 3         | 0      |

|      |   |   |   |   |    |   |
|------|---|---|---|---|----|---|
| 1390 | 0 | 1 | 0 | 0 | 2  | 0 |
| 1400 | 0 | 0 | 1 | 0 | 1  | 0 |
| 1410 | 0 | 0 | 0 | 0 | 1  | 0 |
| 1420 | 0 | 0 | 0 | 0 | 1  | 1 |
| 1430 | 0 | 0 | 0 | 0 | 0  | 1 |
| 1440 | 0 | 1 | 0 | 0 | 0  | 0 |
| 1450 | 0 | 0 | 0 | 1 | 0  | 0 |
| 1460 | 0 | 0 | 0 | 0 | 0  | 0 |
| 1470 | 0 | 0 | 1 | 0 | 2  | 0 |
| 1480 | 0 | 1 | 0 | 1 | 0  | 0 |
| 1490 | 0 | 0 | 0 | 2 | 3  | 0 |
| 1500 | 0 | 0 | 0 | 0 | 2  | 1 |
| 1510 | 0 | 1 | 0 | 2 | 3  | 0 |
| 1520 | 0 | 1 | 2 | 1 | 4  | 0 |
| 1530 | 1 | 0 | 1 | 2 | 3  | 0 |
| 1540 | 0 | 0 | 0 | 2 | 4  | 0 |
| 1550 | 0 | 0 | 0 | 0 | 6  | 1 |
| 1560 | 0 | 2 | 1 | 0 | 3  | 1 |
| 1570 | 0 | 1 | 0 | 0 | 7  | 0 |
| 1580 | 0 | 1 | 1 | 0 | 4  | 0 |
| 1590 | 0 | 1 | 0 | 2 | 1  | 2 |
| 1600 | 0 | 0 | 0 | 3 | 5  | 1 |
| 1610 | 0 | 0 | 1 | 1 | 3  | 2 |
| 1620 | 0 | 0 | 1 | 0 | 8  | 1 |
| 1630 | 0 | 1 | 0 | 0 | 3  | 1 |
| 1640 | 0 | 2 | 0 | 2 | 4  | 1 |
| 1650 | 1 | 1 | 2 | 1 | 3  | 4 |
| 1660 | 0 | 0 | 2 | 1 | 8  | 0 |
| 1670 | 0 | 0 | 0 | 0 | 16 | 3 |
| 1680 | 0 | 1 | 1 | 0 | 7  | 1 |
| 1690 | 0 | 0 | 2 | 0 | 1  | 0 |
| 1700 | 0 | 0 | 1 | 1 | 3  | 2 |
| 1710 | 0 | 1 | 0 | 1 | 3  | 1 |
| 1720 | 0 | 2 | 3 | 1 | 7  | 1 |
| 1730 | 0 | 1 | 4 | 3 | 5  | 2 |
| 1740 | 0 | 3 | 1 | 2 | 4  | 3 |
| 1750 | 0 | 0 | 0 | 1 | 6  | 2 |
| 1760 | 0 | 0 | 0 | 1 | 8  | 1 |
| 1770 | 0 | 2 | 3 | 2 | 8  | 2 |
| 1780 | 0 | 4 | 1 | 0 | 6  | 2 |
| 1790 | 0 | 2 | 1 | 1 | 4  | 0 |
| 1800 | 0 | 1 | 1 | 1 | 4  | 0 |
| 1810 | 0 | 1 | 1 | 2 | 4  | 5 |
| 1820 | 0 | 0 | 1 | 1 | 8  | 2 |
| 1830 | 0 | 4 | 0 | 0 | 2  | 1 |
| 1840 | 0 | 2 | 1 | 1 | 4  | 0 |
| 1850 | 0 | 0 | 1 | 3 | 6  | 4 |
| 1860 | 0 | 1 | 1 | 5 | 10 | 2 |
| 1870 | 0 | 0 | 2 | 1 | 8  | 2 |
| 1880 | 0 | 0 | 1 | 4 | 4  | 1 |
| 1890 | 0 | 0 | 0 | 1 | 5  | 1 |

|      |   |   |   |   |   |   |
|------|---|---|---|---|---|---|
| 1900 | 0 | 0 | 1 | 1 | 5 | 2 |
| 1910 | 0 | 0 | 1 | 1 | 0 | 0 |
| 1920 | 0 | 0 | 0 | 0 | 0 | 0 |
